# Supplementary material for: Clinical Relevance of Corticosteroid Withdrawal on Graft Histological Lesions in Low-Immunological-Risk Kidney Transplant Patients
Source: MDPI journal article supplement (doi:10.3390/jcm10092005), 2021-05-07
Supplement: s1 [file s1]

**Table S1.** Inflammatory and chronicity scores and clinical data in patients with NI and SCI in both study groups at the 3rd month baseline protocol biopsy.

|                           | Group CSC      |                 |          | Group CSW      |                 |          |
|---------------------------|----------------|-----------------|----------|----------------|-----------------|----------|
|                           | NI<br>(n = 28) | SCI<br>(n = 24) | <i>p</i> | NI<br>(n = 23) | SCI<br>(n = 30) | <i>p</i> |
| g (0–3)                   | 0.04 ± 0.20    | 0.04 ± 0.20     | 0.977    | 0              | 0.13 ± 0.35     | 0.043    |
| ptc (0–3)                 | 0              | 0.13 ± 0.34     | 0.083    | 0              | 0.29 ± 0.53     | 0.009    |
| t (0–3)                   | 0              | 0.63 ± 0.50     | 0.000    | 0              | 0.63 ± 0.49     | 0.000    |
| i (0–3)                   | 0              | 1               | -        | 0              | 0.93 ± 0.25     | 0.000    |
| v (0–3)                   | 0              | 0               | -        | 0              | 0.04 ± 0.19     | 0.395    |
| ci (0–3)                  | 0.17 ± 0.39    | 0.64 ± 0.49     | 0.001    | 0.41 ± 0.50    | 0.54 ± 0.51     | 0.384    |
| ct (0–3)                  | 0.14 ± 0.35    | 0.52 ± 0.51     | 0.006    | 0.36 ± 0.49    | 0.50 ± 0.51     | 0.345    |
| cg (0–3)                  | 0              | 0               | -        | 0              | 0               | -        |
| cv (0–3)                  | 0.22 ± 0.42    | 0.68 ± 0.72     | 0.013    | 0.33 ± 0.48    | 0.41 ± 0.50     | 0.608    |
| ah (0–3)                  | 0.24 ± 0.60    | 0.50 ± 0.59     | 0.132    | 0.35 ± 0.57    | 0.33 ± 0.66     | 0.934    |
| ct + ci                   | 0.27 ± 0.70    | 1.14 ± 0.96     | 0.002    | 0.77 ± 0.97    | 1.0 ± 0.92      | 0.406    |
| IFTA ≥ 2                  | 13.6           | 52.4            | 0.007    | 36.4           | 40.7            | 0.754    |
| ct + ci + cg + cv         | 0.50 ± 0.86    | 1.86 ± 1.28     | 0.000    | 1.05 ± 1.15    | 1.41 ± 1.12     | 0.289    |
| Creatinine<br>(mg/dL)     | 1.35 ± 0.45    | 1.48 ± 0.36     | 0.245    | 1.44 ± 0.50    | 1.68 ± 0.40     | 0.063    |
| Proteinuria<br>(mg/dL)    | 335 ± 305      | 255 ± 129       | 0.348    | 263 ± 134      | 301 ± 291       | 0.675    |
| MDRD-4<br>(mL/min)        | 63.3 ± 26.7    | 51.1 ± 12.6     | 0.046    | 55.8 ± 18.1    | 46.5 ± 14.2     | 0.041    |
| Total HLA<br>mismatches * | 5.73 ± 2.63    | 6.79 ± 1.69     | 0.095    | 5.09 ± 2.05    | 6.89 ± 2.3      | 0.006    |
| Tacrolimus<br>(ng/mL)     | 9.85 ± 3.36    | 9.85 ± 1.93     | 0.996    | 9.50 ± 2.23    | 8.6 ± 2.16      | 0.150    |

ah, arteriolar hyaline thickening; ci, chronic interstitial fibrosis; cg, transplant glomerulopathy; ct, chronic tubular; cv, fibrous intimal thickening; g, glomerulitis; i, interstitial infiltration; ptc, peritubular capillaritis; t, tubulitis; v, arteritis; MDRD, modification of diet in renal disease 4 variable for estimating glomerular filtration rate; NI, no inflammation; SCI, subclinical inflammation; IFTA, proportion of patients with sum of interstitial fibrosis and tubular atrophy ≥ 2; Group CSC, corticosteroid withdrawal; Group CSW, corticosteroid continuation. Includes HLA-ABC-DR-DQ mismatching.

**Table S2.** Overall changes in acute inflammatory and chronicity scores from 3 to 24 months in patients with NI and SCI in both study groups.

|                   | NI at Baseline ( <i>n</i> = 51) |             |                |                      |             |                | SCI at Baseline ( <i>n</i> = 54) |             |                |                      |             |                |
|-------------------|---------------------------------|-------------|----------------|----------------------|-------------|----------------|----------------------------------|-------------|----------------|----------------------|-------------|----------------|
|                   | CSC ( <i>n</i> = 28)            |             |                | CSW ( <i>n</i> = 23) |             |                | CSC ( <i>n</i> = 24)             |             |                | CSW ( <i>n</i> = 30) |             |                |
|                   | month 3                         | month 24    | <i>p</i> Value | month 3              | month 24    | <i>p</i> Value | month 3                          | month 24    | <i>p</i> Value | month 3              | month 24    | <i>p</i> Value |
| g (0–3)           | 0.07 ± 0.27                     | 0.29 ± 0.47 | 0.189          | 0                    | 0.22 ± 0.44 | 0.169          | 0.07 ± 0.26                      | 0.07 ± 0.26 | 1              | 0.12 ± 0.33          | 0           | 0.163          |
| ptc (0–3)         | 0                               | 0.50 ± 0.76 | 0.029          | 0                    | 0.33 ± 0.71 | 0.195          | 0.13 ± 0.35                      | 0           | 0.164          | 0.24 ± 0.44          | 0.12 ± 0.33 | 0.332          |
| t (0–3)           | 0                               | 0.54 ± 0.52 | 0.003          | 0                    | 0.56 ± 0.73 | 0.051          | 0.60 ± 0.51                      | 0.47 ± 0.83 | 0.582          | 0.53 ± 0.52          | 0.53 ± 0.52 | 1              |
| i (0–3)           | 0                               | 0.86 ± 0.54 | 0.000          | 0                    | 0.56 ± 0.73 | 0.051          | 1                                | 0.80 ± 0.86 | 0.384          | 0.94 ± 0.24          | 0.71 ± 0.69 | 0.163          |
| v (0–3)           | 0                               | 0           | -              | 0                    | 0           | -              | 0                                | 0           | -              | 0                    | 0           | -              |
| ci (0–3)          | 0.09 ± 0.30                     | 0.73 ± 0.79 | 0.026          | 0.44 ± 0.53          | 0.89 ± 0.93 | 0.272          | 0.46 ± 0.52                      | 0.62 ± 0.51 | 0.436          | 0.63 ± 0.50          | 0.94 ± 0.68 | 0.096          |
| ct (0–3)          | 0.09 ± 0.30                     | 0.64 ± 0.67 | 0.052          | 0.33 ± 0.50          | 1.00 ± 0.87 | 0.111          | 0.46 ± 0.52                      | 0.69 ± 0.48 | 0.273          | 0.50 ± 0.52          | 0.88 ± 0.72 | 0.083          |
| cg (0–3)          | 0                               | 0.36 ± 0.67 | 0.104          | 0                    | 0           | -              | 0                                | 0           | -              | 0                    | 0           | -              |
| cv (0–3)          | 0.30 ± 0.48                     | 0.50 ± 0.85 | 0.509          | 0                    | 0.63 ± 0.52 | 0.011          | 0.69 ± 0.75                      | 0.54 ± 0.66 | 0.549          | 0.53 ± 0.52          | 0.67 ± 0.90 | 0.670          |
| ah (0–3)          | 0.23 ± 0.60                     | 0.85 ± 1.07 | 0.055          | 0.22 ± 0.44          | 0.44 ± 0.53 | 0.447          | 0.33 ± 0.49                      | 0.27 ± 0.46 | 0.670          | 0.18 ± 0.39          | 0.71 ± 0.77 | 0.015          |
| ct + ci           | 0.18 ± 0.60                     | 1.36 ± 1.36 | 0.029          | 0.78 ± 0.97          | 1.89 ± 1.76 | 0.169          | 0.92 ± 1.04                      | 1.31 ± 0.95 | 0.337          | 1.12 ± 0.89          | 1.81 ± 1.38 | 0.058          |
| IFTA ≥ 2          | 13.6                            | 46.2        | 0.338          | 36.4                 | 66.7        | 0.762          | 52.4                             | 53.3        | 0.725          | 40.7                 | 64.7        | 0.197          |
| ct + ci + cg + cv | 0.5 ± 0.97                      | 2.30 ± 1.89 | 0.012          | 0.88 ± 0.99          | 2.75 ± 1.58 | 0.044          | 1.62 ± 1.26                      | 1.85 ± 1.21 | 0.732          | 1.73 ± 1.03          | 2.60 ± 1.45 | 0.084          |

ah, arteriolar hyalinosis; ci, chronic interstitial fibrosis; cg, transplant glomerulopathy; ct, tubular atrophy; cv, vascular fibrous intimal thickening; g, glomerulitis; i, interstitial inflammation; ptc, peritubular capillaritis; t, tubulitis; v, intimal arteritis; NI, no inflammation; SCI, subclinical inflammation; IFTA, proportion of patients with sum of interstitial fibrosis and tubular atrophy ≥ 2; Group CSC, corticosteroid continuation; Group CSW, corticosteroid withdrawal.

**Table S3.** Chronicity scores in patients with NI and SCI in the subset of kidney transplant recipients who received grafts from expanded criteria donors (n=44) at the 3-month protocol biopsy.

|                    | NI<br>(n = 18) | SCI<br>(n = 26) | <i>p</i> |
|--------------------|----------------|-----------------|----------|
| <b>ci (0-3)</b>    | 0.40±0.51      | 0.54±0.51       | 0.406    |
| <b>ct (0-3)</b>    | 0.36±0.50      | 0.52±0.51       | 0.341    |
| <b>cg (0-3)</b>    | 0              | 0               |          |
| <b>cv (0-3)</b>    | 0.57±0.51      | 0.54±0.58       | 0.860    |
| <b>ct+ci</b>       | 0.71±0.99      | 1.04±0.93       | 0.314    |
| <b>IFTA ≥2 (%)</b> | 35.7           | 44              | 0.614    |
| <b>ct+ci+cg+cv</b> | 1.25±1.22      | 1.60±1.15       | 0.402    |

ci, chronic interstitial fibrosis; cg, transplant glomerulopathy; ct, tubular atrophy; cv, vascular fibrous intimal thickening; IFTA, proportion of patients with sum of interstitial fibrosis and tubular atrophy ≥ 2; NI, no inflammation; SCI, subclinical inflammation.
